# Supplementary material for: Cost-Effectiveness of Treatments for Adolescent Depression: Results From TADS
Source: Atypon-hosted journal article supplement (doi:10.1176/appi.ajp.2008.07101610), 2008-04-16

## Supplemental Material

Figure 1: Incremental Cost-Effectiveness Ratio (ICER) Planes Comparing Active Treatment Arms to Placebo (N=369; 1000 bootstrap replications)

a. Fluoxetine vs Placebo

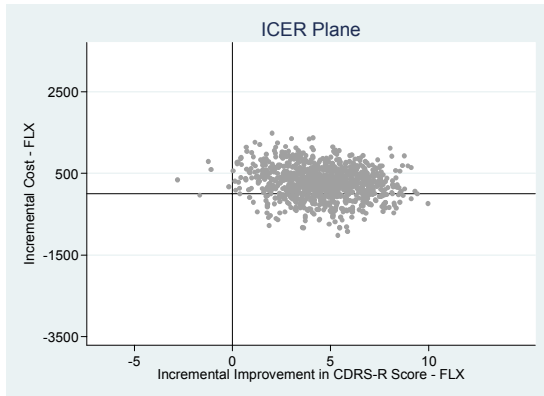

b. CBT vs Placebo

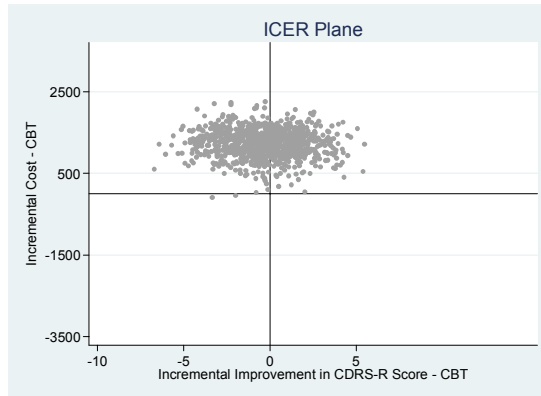

c. Combination Therapy vs Placebo

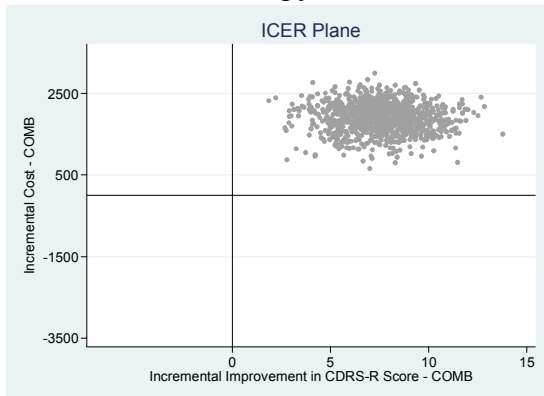

Figure 2: Incremental Cost-Effectiveness Ratios (ICER) for Combination Therapy vs Fluoxetine (N=186; 1000 bootstrap replications)

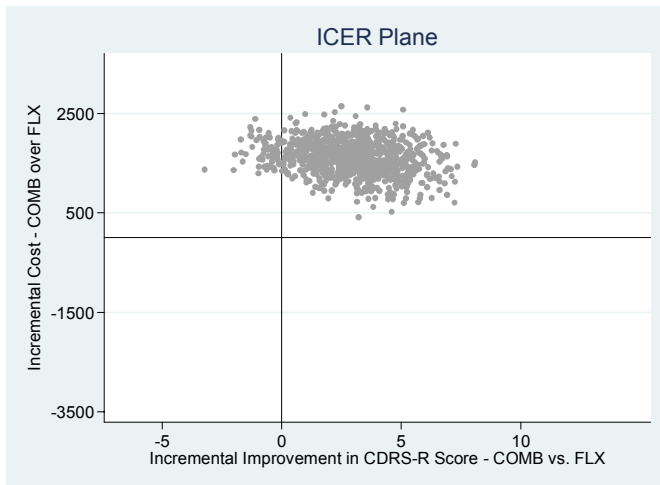

Figure 3: Cost-Effectiveness Acceptability Curve for Combination Therapy vs Fluoxetine Comparison (N=186; 1000 bootstrap replications)

a. CDRS-R scale

b. QALY scale

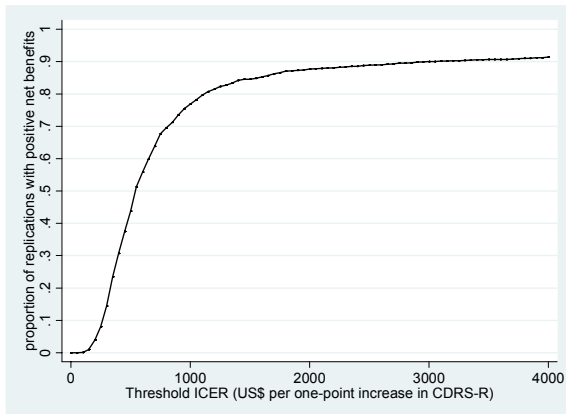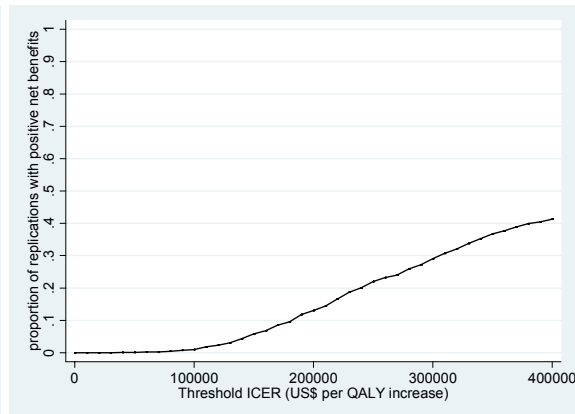

Supplement: ajp_165_5_588_01.pdf [file ajp_165_5_588_01.pdf]
